# Supplementary material for: Structure–activity relationships of Cu–ZrO2 catalysts for CO2 hydrogenation to methanol: interaction effects and reaction mechanism
Source: Royal Society of Chemistry journal article supplement (doi:10.1039/c6ra28305e), 2017-01-01
Supplement: c6ra28305e1.pdf [file c6ra28305e1.pdf]

## Structure-Activity Relationships of Cu-ZrO<sub>2</sub> Catalysts for CO<sub>2</sub> Hydrogenation to Methanol: Interaction Effects and Reaction Mechanism

Received 00th January 20xx,  
Accepted 00th January 20xx

DOI: 10.1039/x0xx00000x

Yu Hao Wang<sup>a,b</sup>, Wen Gui Gao<sup>a,b\*</sup>, Hua Wang<sup>a,b</sup>, Yan E Zheng<sup>a,b</sup>, Wei Na<sup>a,b</sup>, Kong Zhai Li<sup>a,b</sup>

www.rsc.org/

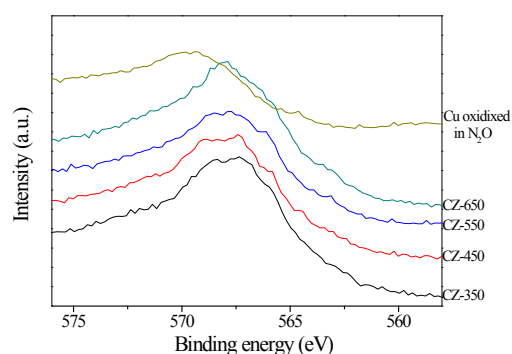

**Figure S1.** The change in the Cu L3VV Auger line for the reduced CZ catalyst and Cu oxidized in N<sub>2</sub>O

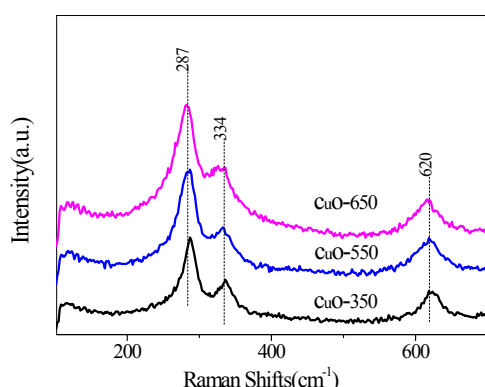

**Figure S2.** Raman spectra of various CuO calcinated at 350, 550 and 650 °C.

<sup>a</sup>. State Key Laboratory of Complex Nonferrous Metal Resources Clean Utilization, Kunming University of Science and Technology, Kunming 650093, China. E-mail: Wengui Gao(gao\_wengui@126.com)

<sup>b</sup>. Faculty of Metallurgical and Energy Engineering, Kunming University of Science and Technology, Kunming 650093, China.

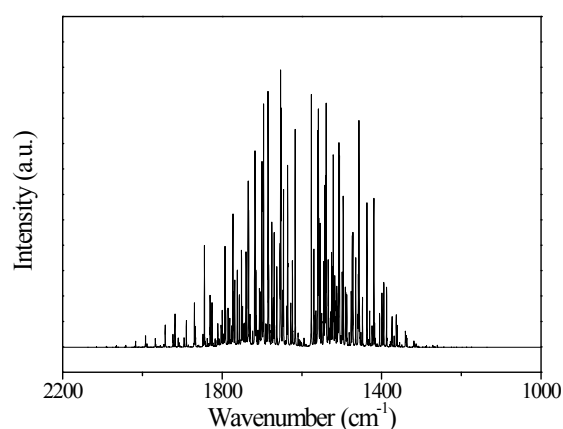

**Figure S3.** In situ DRIFT spectra of H<sub>2</sub>O (1000ppm)

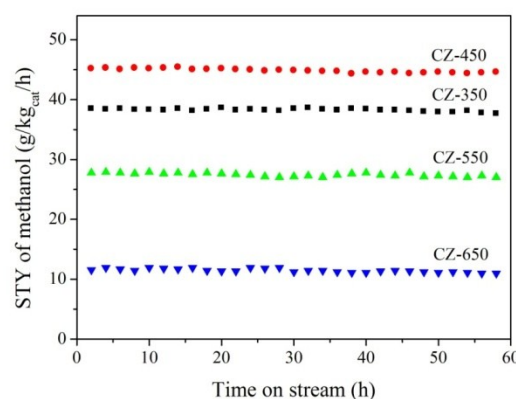

**Figure S4.** Space-time yield (STY) of methanol as a function of time-on-stream over CZ-350, CZ-450, CZ-550 and CZ-650. Reaction conditions: T=220 °C, CO<sub>2</sub>:H<sub>2</sub>=1:3, P=3.0 MPa, GHSV=3600 h<sup>-1</sup>.

Stability is a key factor in determining whether the Cu/ZrO<sub>2</sub> materials can be used as methanol synthesis catalyst for CO<sub>2</sub> hydrogenation reaction in industrial production. Figure S4 shows the STY versus the time-on-stream of methanol over four catalysts: CZ-350, CZ-450, CZ-550 and CZ-650. It was found that the STY for methanol decreased by less than 3% from its initially stabilized values. It was obvious that the CZ catalysts exhibited a stable catalytic performance for the whole test period.
